# Supplementary material for: Ring strain and total syntheses of modified macrocycles of the isoplagiochin type
Source: publisher site journal article supplement (doi:10.3762/bjoc.5.71), 2009-12-01
Supplement: Additional file 1 [file 1860-5397-5-71-S1.pdf]

## **Supporting Information for**

# **Ring strain and total syntheses of modified macrocycles of the isoplagiochin type**

Andreas Speicher\*, Timo Backes, Kerstin Hesidens and Jürgen Kolz

Address: Department 8.1 Chemistry – Organic Chemistry, Saarland University, 66041  
Saarbrücken, Germany

Email: Andreas Speicher - [anspeich@mx.uni-saarland.de](mailto:anspeich@mx.uni-saarland.de)

\* Corresponding author

## **Full experimental details and characterization data**

## General

The  $^1\text{H}$  (500 MHz) and  $^{13}\text{C}$  NMR (125 MHz) spectra were recorded on a Bruker DRX 500 spectrometer referencing to solvent or TMS with the chemical shift recorded as  $\delta$  values in ppm. Coupling constants ( $J$ ) are given in Hertz, and multiplicity is defined as follows: s = singlet, d = doublet, dd = doublet of doublet, t = triplet, q = quartet, m = multiplet, br = broad. The infrared (IR) spectra were recorded in terms of  $\text{cm}^{-1}$  on a Bruker Tensor 27 FT-IR spectrometer. Mass spectra were obtained on a Finnigan MAT 95. The melting points (mp) were determined on a Büchi melting point apparatus (Dr. Tottoli). Column chromatography was performed on a silica gel 60 (63–260  $\mu\text{m}$ ).

## Temperature dependent $^1\text{H}$ NMR experiments for the tetramethylether **3** of isoplagiochin **C** and assignment of NMR data

The  $^1\text{H}$  NMR spectrum of **3** was measured at different temperatures between  $-30\text{ }^\circ\text{C}$  and  $+60\text{ }^\circ\text{C}$  in  $\text{CDCl}_3$ . Coalescence of the signals for the four methoxy groups was observed at  $+15\text{ }^\circ\text{C}$  (two sets),  $+40\text{ }^\circ\text{C}$  and  $+55\text{ }^\circ\text{C}$  (see Figure 3 in the main document).

The rotation barrier was approximated according to the formula

$$\Delta G^\ddagger = 19.1 \cdot 10^{-3} \cdot T_C \cdot (9.97 + \log T_C - \log |v_A - v_B|)$$

( $T_C$ : coalescence temperature in K,

$v_A, v_B$ : resonance frequencies in Hz of the separated signals)

resulting in values of 66.0 to 66.4 kJ/mol.

For the exact assignment of NMR data especially for the four methoxy groups 2D NMR spectra (COSY, HSQC, HMBC) were measured at  $+100\text{ }^\circ\text{C}$  in  $[\text{D}_6]\text{-DMSO}$ .

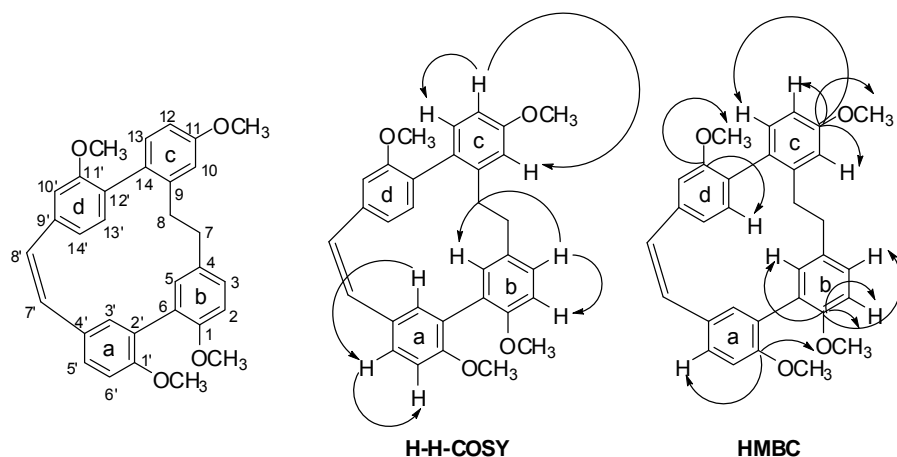

**Figure 4:** Typical NMR correlations for **3**.

**Table 2:** Assignment of 2D NMR data for compound **3** ([D<sub>6</sub>]-DMSO, 100 °C).

| Position                  | $\delta$ C (ppm) | $\delta$ H (ppm) | Position                   | $\delta$ C (ppm) | $\delta$ H (ppm)        |
|---------------------------|------------------|------------------|----------------------------|------------------|-------------------------|
| 1                         | 154.8            | –                | 1'                         | 155.8            | –                       |
| 2                         | 110.9            | 6.80 (d)         | 2'                         | 128.2            |                         |
| 3                         | 126.3            | 7.04 (d)         | 3'                         | 132.3            | 6.89 (S <sub>br</sub> ) |
| 4                         | 134.5            | –                | 4'                         | 128.0            | –                       |
| 5                         | 132.2            | 6.40 (d)         | 5'                         | 128.6            | 7.25 (dd)               |
| 6                         | 127.6            | –                | 6'                         | 111.0            | 6.97 (d)                |
| 7                         | 36.0             | 2.00–2.70 (m)    | 7'                         | 129.3            | 6.65 (d)                |
| 8                         | 37.0             | 2.00–2.70 (m)    | 8'                         | 128.1            | 6.70 (d)                |
| 9                         | 142.3            | –                | 9'                         | 138.9            | –                       |
| 10                        | 113.5            | 6.92 (d)         | 10'                        | 111.4            | 6.89 (S <sub>br</sub> ) |
| 11                        | 158.3            | –                | 11'                        | 156.7            | –                       |
| 12                        | 110.7            | 6.80 (d)         | 12'                        | not separated    | –                       |
| 13                        | 130.2            | 7.04 (d)         | 13'                        | 130.9            | 7.08 (d)                |
| 14                        | 129.6            | –                | 14'                        | 120.0            | 6.84 (d)                |
| <b>1-OCH<sub>3</sub></b>  | <b>55.2</b>      | <b>3.69 (s)</b>  | <b>1'-OCH<sub>3</sub></b>  | <b>54.9</b>      | <b>3.75 (s)</b>         |
| <b>11-OCH<sub>3</sub></b> | <b>54.6</b>      | <b>3.82 (s)</b>  | <b>11'-OCH<sub>3</sub></b> | <b>55.0</b>      | <b>3.55 (s)</b>         |

## 2-(3-Bromo-4-methoxyphenyl)-1,3-dioxane (**11**)

A mixture of 3-bromo-4-methoxybenzaldehyde (**10**, 25.0 g, 116 mmol), triethyl orthoformate (19.0 g, 128 mmol), 1,3-propanediol (35.4 g, 464 mmol, 33.8 mL) and tetrabutylammonium tribromide (560 mg, 1.16 mmol) was stirred for 1 h at room

temperature. The reaction mixture was taken up in EtOAc (200 mL), washed with saturated NaHCO<sub>3</sub> (2 × 100 mL) and H<sub>2</sub>O (3 × 100 mL), dried (MgSO<sub>4</sub>) and concentrated yielding a colorless oil which solidifies on standing, 31.1 g (98%), mp 67 °C.

**IR:**  $\nu$  (cm<sup>-1</sup>) = 2955, 2840, 1620, 1510, 1460, 1370, 1295, 1235, 1205, 1180, 1130, 1150, 1050, 1020, 980, 950, 880, 850, 810, 780, 670.

**<sup>1</sup>H NMR** (CDCl<sub>3</sub>):  $\delta$  (ppm) = 7.69 (d,  $J$  = 1.9 Hz, 1 H, Ar-H), 7.38 (dd,  $J_1$  = 8.5 Hz,  $J_2$  = 1.9 Hz, 1 H, Ar-H), 6.87 (d,  $J$  = 8.5 Hz, 1 H, Ar-H), 5.43 (s, 1 H, -OCHO-), 4.26–4.21 (combined signals, 2 H, -OCH<sub>2</sub>-), 4.00–3.92 (combined signals, 2 H, -OCH<sub>2</sub>-), 3.88 (s, 3 H, -OCH<sub>3</sub>), 2.25–2.13 (m, 1 H, HCH), 1.41 (d,  $J$  = 13.7 Hz, 1 H, HCH).

**<sup>13</sup>C NMR** (CDCl<sub>3</sub>):  $\delta$  (ppm) = 156.16, 132.69, 131.25, 126.29, 111.46, 100.53 (-OCHO-), 67.36, 56.31, 25.70.

## 5-Formyl-2-methoxyphenylboronic acid (**12**)

To the bromoarene **11** (10.5 g, 38.4 mmol) in anhydrous THF (200 mL) was added dropwise *n*-BuLi in *n*-hexane (2.5 M, 16.8 mL, 42.0 mmol) at  $T < -70$  °C. Stirring was continued for 4 h at  $T < -70$  °C. Trimethyl borate (4.98 g, 47.9 mmol) was added, the mixture was allowed to warm up to room temperature overnight and hydrolyzed with 2 M HCl (100 mL). The aqueous layer was extracted with Et<sub>2</sub>O (2 × 100 mL) and the combined organic layers were extracted with 2 M NaOH (2 × 100 mL). The alkaline solution was acidified to pH 1 (conc. HCl). The boronic acid as precipitate was filtered off and dried *in vacuo* (CaCl<sub>2</sub>); pale yellow solid, 5.39 g (78%), mp 160 °C.

**IR:**  $\nu$  (cm<sup>-1</sup>) = 3235 (OH), 1690 (C=O), 1660, 1600, 1575, 1495, 1465, 1425, 1400, 1380, 1250, 1210, 1180, 1140, 1045, 1015, 895, 840, 770, 755, 720, 665.

**<sup>1</sup>H NMR** ([D<sub>6</sub>]-DMSO):  $\delta$  (ppm) = 9.87 (s, 1 H, CHO), 8.04 (d,  $J$  = 2.1 Hz, 1 H, Ar-H), 7.92 (dd,  $J_1$  = 8.5 Hz,  $J_2$  = 2.2 Hz, 1 H, Ar-H), 7.92 (s, 2 H, -B(OH)<sub>2</sub>), 7.15 (d,  $J$  = 8.5 Hz, 1 H, Ar-H), 3.88 (s, 3 H, -OCH<sub>3</sub>).

**<sup>13</sup>C NMR** ([D<sub>6</sub>]-DMSO):  $\delta$  (ppm) = 191.57 (-CHO), 167.85, 136.86, 133.65, 129.10, 110.76, 55.82.

### **5'-(1,3-Dioxan-2-yl)-6,2'-dimethoxybiphenyl-3-carbaldehyde (13)**

The bromoarene **11** (6.64 g, 24.3 mmol) and the boronic acid **12** (4.83 g, 26.8 mmol) were dissolved in a mixture of toluene (45 mL), 2 M Na<sub>2</sub>CO<sub>3</sub> (22 mL) and EtOH (30 mL) and degassed with argon. Tetrakis(triphenylphosphane)-palladium(0) (867 mg, 0.75 mmol) was added and the mixture was heated to reflux for 24 h, cooled to room temperature and filtered through an alumina pad eluting with Et<sub>2</sub>O. H<sub>2</sub>O (200 mL) was added and the mixture was extracted with Et<sub>2</sub>O (4 × 200 mL). The combined organic layers were dried (MgSO<sub>4</sub>) and concentrated. The crude product was purified filtrating through an alumina pad (basic, activity III) in CH<sub>2</sub>Cl<sub>2</sub>; pale yellow oil which solidifies; 7.10 g (89%), mp 105 °C.

**IR:**  $\nu$  (cm<sup>-1</sup>) = 2965, 2840, 2725, 1690 (C=O), 1605, 1505, 1465, 1445, 1380, 1275, 1210, 1175, 1150, 1130, 1105, 1050, 1000, 940, 900, 870, 855, 820, 790, 735, 705.

**<sup>1</sup>H NMR** (CDCl<sub>3</sub>):  $\delta$  (ppm) = 9.90 (s, 1 H, -CHO), 7.88 (dd,  $J_1$  = 8.5 Hz,  $J_2$  = 2.2 Hz, 1 H, Ar-H), 7.77 (d,  $J$  = 2.2 Hz, 1 H, Ar-H), 7.47 (dd,  $J_1$  = 8.5 Hz,  $J_2$  = 2.2 Hz, 1 H, Ar-H), 7.34 (d,  $J$  = 2.2 Hz, 1 H, Ar-H), 7.04 (d,  $J$  = 8.5 Hz, 1 H, Ar-H), 6.95 (d,  $J$  = 8.5 Hz, 1 H, Ar-H), 5.49 (s, 1 H, -OCHO-), 4.27–4.24 (combined signals, 2 H, -OCH<sub>2</sub>-), 4.00–3.95 (combined signals, 2 H, -OCH<sub>2</sub>-), 3.83 (s, 3 H, -OCH<sub>3</sub>), 3.76 (s, 3 H, -OCH<sub>3</sub>), 2.26–2.16 (m, 1 H, HCH), 1.43 (d,  $J$  = 13.6 Hz, 1 H, HCH).

**<sup>13</sup>C NMR** (CDCl<sub>3</sub>):  $\delta$  (ppm) = 190.99 (–CHO), 162.27, 157.45, 133.54, 131.16, 131.12, 129.55, 129.08, 128.67, 126.98, 126.36, 110.77, 110.72, 101.45 (–OCHO–), 67.38, 55.90, 55.85, 25.78.

## **2-(5'-Ethynyl-6,2'-dimethoxybiphenyl-3-yl)-1,3-dioxane (14)**

Bromomethyltriphenylphosphonium bromide (11.6 g, 26.8 mmol) was dissolved in anhydrous THF (200 mL) under argon atmosphere and cooled to –78 °C. *t*-BuOK (31.6 g, 56.3 mmol, 20% w/w in anhydrous THF) was added slowly and the mixture was stirred for 1 h at –78 °C. To the orange solution the aldehyde **13** (7.32 g, 22.3 mmol) in anhydrous THF (200 mL) was added dropwise at T < –70 °C. The mixture was allowed to warm to room temperature within 6 h and taken up in Et<sub>2</sub>O (300 mL). The organic layer was washed with H<sub>2</sub>O (3 × 200 mL), brine (200 mL), dried (MgSO<sub>4</sub>) and concentrated. The crude product was purified by CC (basic alumina, activity III, CH<sub>2</sub>Cl<sub>2</sub>), pale yellow solid, 6.73 g (93%), mp 105 °C.

**IR:**  $\nu$  (cm<sup>-1</sup>) = 3272 (C≡C–H), 2965, 2838, 2210, 1760, 1600, 1583, 1492, 1463, 1440, 1367, 1331, 1271, 1234, 1179, 1147, 1131, 1116, 1100, 1045, 1014, 967, 952, 894, 876, 864, 809, 624, 614.

**<sup>1</sup>H NMR** (CDCl<sub>3</sub>):  $\delta$  (ppm) = 7.45 (dd,  $J_1$  = 8.5 Hz,  $J_2$  = 2.2 Hz, 1 H, Ar-H), 7.44 (dd,  $J_1$  = 8.5 Hz,  $J_2$  = 2.2 Hz, 1 H, Ar-H), 7.37 (d,  $J$  = 2.2 Hz, 1 H, Ar-H), 7.31 (d,  $J$  = 2.2 Hz, 1 H, Ar-H), 6.93 (d,  $J$  = 8.5 Hz, 1 H, Ar-H), 6.86 (d,  $J$  = 8.5 Hz, 1 H, Ar-H), 5.48 (s, 1 H, –OCHO–), 4.27–4.22 (combined signals, 2 H, –OCH<sub>2</sub>–), 3.99–3.94 (combined signals, 2 H, –OCH<sub>2</sub>–), 3.75 (s, 3 H, –OCH<sub>3</sub>), 3.74 (s, 3 H, –OCH<sub>3</sub>), 2.97 (s, 1 H, –C≡CH), 2.25–2.15 (m, 1 H, HCH), 1.42 (m, 1 H, HCH).

**<sup>13</sup>C NMR** (CDCl<sub>3</sub>):  $\delta$  (ppm) = 157.69, 157.48, 135.24, 132.75, 131.04, 129.18, 128.18, 126.77, 126.65, 113.84, 110.77, 110.75, 101.52 (–OCHO–), 83.83 (–C≡C–), 75.61 (–C≡C–), 67.36, 55.88, 55.69, 25.79.

**MS** (CI, 120 eV):  $m/z$  (%) = 324 (100, M<sup>+</sup>), 323 (40), 293 (10), 266 (20), 248 (5), 208 (5), 193 (10), 165 (3), 87 (18).

### **5'-[(2-Bromo-5-methoxyphenyl)ethynyl]-6,2'-dimethoxybiphenyl-3-carbaldehyde (16)**

To 4-Bromo-3-iodoanisole (**15**, 4.46 g, 14.3 mmol), CuI (273 mg, 1.43 mmol), *N,N*-dimethylglycine hydrochloride (596 mg, 4.28 mmol) and K<sub>2</sub>CO<sub>3</sub> (5.91 g, 42.8 mmol) in a pre-conditioned oxygen free argon atmosphere was added the alkyne **14** (5.56 g (17.1 mmol) in DMF (40 mL) and H<sub>2</sub>O (1 mL, both degassed). The mixture was heated to 100 °C for 12 h (argon atmosphere), cooled and taken up in EtOAc (200 mL) and H<sub>2</sub>O (100 mL). The layers were separated and the aqueous layer was extracted with EtOAc (2 × 50 mL). The combined organic layers were washed with H<sub>2</sub>O (2 × 50 mL), dried (MgSO<sub>4</sub>) and concentrated. The residue was taken up in 1,4-dioxane (50 mL) and hydrolyzed with 2 M HCl (20 mL) for 1 h at room temperature. The mixture was extracted with EtOAc (3 × 50 mL), washed (3 × 100 mL H<sub>2</sub>O), dried (MgSO<sub>4</sub>) and concentrated. The crude product was purified by CC (silica gel, CH<sub>2</sub>Cl<sub>2</sub>); colorless solid, 4.58 g (71%), mp 100–103 °C.

**IR:**  $\nu$  (cm<sup>-1</sup>) = 2935, 2837, 2205 (C≡C), 1684 (C=O), 1584, 1491, 1460, 1439, 1391, 1249, 1172, 1144, 1113, 1040, 1016, 959, 905, 852, 813.

**<sup>1</sup>H NMR** (CDCl<sub>3</sub>):  $\delta$  (ppm) = 9.92 (s, 1 H, –CHO), 7.90 (dd,  $J_1$  = 8.5 Hz,  $J_2$  = 2.2 Hz, 1 H, Ar-H), 7.79 (d,  $J$  = 2.2 Hz, 1 H, Ar-H), 7.59 (dd,  $J_1$  = 8.5 Hz,  $J_2$  = 2.2 Hz, 1 H, Ar-H), 7.46 (combined signals, 2 H, Ar-H), 7.08 (d,  $J$  = 8.5 Hz, 1 H, Ar-H), 7.05 (d,  $J$  =

2.8 Hz, 1 H, Ar-H), 6.96 (d,  $J = 8.5$  Hz, 1 H, Ar-H), 6.74 (dd,  $J_1 = 8.8$  Hz,  $J_2 = 2.8$  Hz, 1 H, Ar-H), 3.87 (s, 3 H,  $-\text{OCH}_3$ ), 3.80 (s, 3 H,  $-\text{OCH}_3$ ), 3.79 (s, 3 H,  $-\text{OCH}_3$ ).

$^{13}\text{C}$  NMR ( $\text{CDCl}_3$ ):  $\delta$  (ppm) = 190.84 ( $-\text{CHO}$ ), 162.15, 158.51, 157.54, 134.69, 133.31, 133.02, 132.95, 131.56, 129.65, 127.71, 126.82, 126.24, 117.62, 116.25, 116.21, 114.92, 111.07, 110.93, 93.69 ( $-\text{C}\equiv\text{C}-$ ), 87.15 ( $-\text{C}\equiv\text{C}-$ ), 56.01, 55.82, 55.57.

MS (CI, 120 eV):  $m/z$  (%) = 452 (40,  $\text{M}^+$ ), 450 (35), 373 (20), 372 (100), 344 (20), 328 (5), 279 (2).

by-product: dialkyne **17**, mp 145–150 °C

$^1\text{H}$  NMR ( $\text{CDCl}_3$ ):  $\delta$  (ppm) = 9.90 (s, 1 H,  $-\text{CHO}$ ), 7.89 (dd,  $J_1 = 8.5$  Hz,  $J_2 = 2.2$  Hz, 1 H, Ar-H), 7.75 (d,  $J = 2.2$  Hz, 1 H, Ar-H), 7.53 (dd,  $J_1 = 8.8$  Hz,  $J_2 = 2.2$  Hz, 1 H, Ar-H), 7.40 (d,  $J = 2.2$  Hz, 1 H, Ar-H), 7.07 (d,  $J = 8.5$  Hz, 1 H, Ar-H), 6.92 (d,  $J = 8.8$  Hz, 1 H, Ar-H), 3.86 (s, 3 H,  $-\text{OCH}_3$ ), 3.78 (s, 3 H,  $-\text{OCH}_3$ ).

$^{13}\text{C}$  NMR ( $\text{CDCl}_3$ ):  $\delta$  (ppm) = 190.78 ( $-\text{CHO}$ ), 162.04, 157.78, 135.46, 133.79, 133.31, 131.57, 129.62, 127.34, 126.80, 113.87, 111.13, 110.97, 81.13 ( $\text{Ar}-\text{C}\equiv\text{C}-\text{C}\equiv\text{C}$ ), 73.24 ( $\text{Ar}-\text{C}\equiv\text{C}-\text{C}\equiv\text{C}$ ), 56.00, 55.79.

## 4-Iodo-3-methoxybenzoic acid (**19**)

step (1): 4-Iodo-3-hydroxybenzoic acid

3-Hydroxybenzoic acid (**18**, 20.8 g, 150 mmol) was dissolved in 2 M NaOH (200 mL) and a solution of iodine (35.1 g, 138 mmol) and KI (27.5 g, 165 mmol) in  $\text{H}_2\text{O}$  (150 mL) was added dropwise. Stirring was continued for 20 min, concentrated HCl (180 mL) was added and the precipitate was filtered off, re-crystallized from EtOH– $\text{H}_2\text{O}$  (1:5) and dried *in vacuo* ( $\text{P}_4\text{O}_{10}$ ); colorless solid, 25.3 g (64%), mp 219–221 °C.



step (2): 4-Iodo-3-methoxybenzoic acid methyl ester

4-Iodo-3-hydroxybenzoic acid (10.0 g, 37.9 mmol), dimethyl sulfate (21.8 g, 189 mmol, 18.0 mL) and  $K_2CO_3$  (15.7 g, 114 mmol) in acetone (100 mL) were heated to reflux for 12 h.  $H_2O$  (200 mL) was added, the mixture was stirred for 12 h at room temperature and extracted with EtOAc ( $2 \times 100$  mL). The combined organic layers were dried ( $MgSO_4$ ) and concentrated. The residue was filtered through a silica gel pad ( $CHCl_3$ ); colorless oil which solidifies; 10.7 g (97%), mp 48–49 °C.

step(3): 4-Iodo-3-methoxybenzoic acid (**19**)

4-Iodo-3-methoxybenzoic acid methyl ester (4.60 g, 15.8 mmol) was dissolved in 2 M NaOH (100 mL) and stirred for 24 h at room temperature. The alkaline solution was acidified with concentrated HCl and the precipitate was filtered off, washed ( $H_2O$ ) and dried *in vacuo* over  $P_4O_{10}$ ; colorless solid, 4.08 g (93%), mp 219–220 °C.

**IR:**  $\nu$  ( $cm^{-1}$ ) = 2967 (OH), 2840, 2654, 2533, 1689, 1572, 1463, 1421, 1296, 1250, 1188, 1121, 1041, 1016, 933, 879, 828, 761, 601.

**$^1H$  NMR** ( $CDCl_3$ ):  $\delta$  (ppm) = 7.91 (d,  $J = 8.0$  Hz, 1 H, Ar-H), 7.44 (d,  $J = 1.8$  Hz, 1 H, Ar-H), 7.32 (dd,  $J_1 = 8.0$  Hz,  $J_2 = 1.8$  Hz, 1 H, Ar-H), 3.91 (s, 3 H,  $-OCH_3$ ).

**$^{13}C$  NMR** ( $CDCl_3$ ):  $\delta$  (ppm) = 166.77 ( $-COOH$ ), 157.83, 139.24, 132.57, 123.14, 111.25, 92.49 ( $C_{Ar-I}$ ), 56.45.

**MS** (Cl, 120 eV):  $m/z$  (%) = 278 (50,  $M^+$ ), 263 (68), 261–257 (45–100), 201 (35), 179 (35), 152 (18), 121 (10), 87 (40).

### **(4-Iodo-3-methoxyphenyl)methanol (**20**)**

To thionyl chloride (50 mL, 0.69 mol) was added the benzoic acid **19** (14.5 g, 52.0 mmol) and the solution was heated to reflux for 1 h. The excess of thionyl chloride was distilled off, the crude benzoyl chloride was dissolved in anhydrous 1,4-dioxane

(100 mL), NaBH<sub>4</sub> (5.93 g, 156 mmol) was added and the mixture was heated to 100 °C for 1 h. H<sub>2</sub>O (10 mL) was added, most of the solvent was removed *in vacuo* and the residue was extracted with CH<sub>2</sub>Cl<sub>2</sub> (3 × 50 mL). The combined organic layers were dried (MgSO<sub>4</sub>) and concentrated. Purification by CC (short pad of silica gel, CHCl<sub>3</sub>) yielded a colorless oil; 10.6 g (77%).

**IR:**  $\nu$  (cm<sup>-1</sup>) = 3219 (OH), 3000, 2934, 2831, 1686, 1588, 1571, 1501, 1476, 1459, 1399, 1256, 1186, 1163, 1127, 1034, 1012, 868, 847, 803, 759.

**<sup>1</sup>H NMR** (CDCl<sub>3</sub>):  $\delta$  (ppm) = 7.72 (d,  $J$  = 7.9 Hz, 1 H, Ar-H), 6.86 (d,  $J$  = 1.6 Hz, 1 H, Ar-H), 6.69 (dd,  $J_1$  = 7.9 Hz,  $J_2$  = 1.6 Hz, 1 H, Ar-H), 4.65 (s, 2 H, Ar-CH<sub>2</sub>-O), 3.89 (s, 3 H, -OCH<sub>3</sub>).

**<sup>13</sup>C NMR** (CDCl<sub>3</sub>):  $\delta$  (ppm) = 158.29, 142.94, 139.39, 120.74, 109.44, 84.59 (C<sub>Ar-I</sub>), 64.76 (Ar-CH<sub>2</sub>-O), 56.32.

**MS** (CI, 120 eV):  $m/z$  (%) = 264 (100, M<sup>+</sup>), 247 (10), 137 (3), 109 (8).

## **2-(4-Iodo-3-methoxybenzyloxy)tetrahydropyran (21)**

The iodobenzyl alcohol **20** (2.52 g, 9.39 mmol) was dissolved in anhydrous CH<sub>2</sub>Cl<sub>2</sub> (25 mL), 3,4-dihydro-2*H*-pyran (1.98 g, 2.12 mL, 23.5 mmol) and *p*-toluenesulfonic acid monohydrate (36.3 mg, 0.19 mmol) were added and the mixture was stirred for 16 h at room temperature. The solvent was removed and the residue was purified by CC (silica gel, CH<sub>2</sub>Cl<sub>2</sub>); colorless oil, 2.50 g (76%).

**IR:**  $\nu$  (cm<sup>-1</sup>) = 2937, 2865, 1574, 1461, 1405, 1347, 1279, 1256, 1200, 1169, 1118, 1075, 1032, 1013, 974, 903, 869, 811.

**<sup>1</sup>H NMR** (CDCl<sub>3</sub>):  $\delta$  (ppm) = 7.72 (d,  $J$  = 7.9 Hz, 1 H, Ar-H), 6.85 (d,  $J$  = 1.9 Hz, 1 H, Ar-H), 6.72 (dd,  $J_1$  = 7.9 Hz,  $J_2$  = 1.9 Hz, 1 H, Ar-H), 4.74, 4.47 (2 d,  $J$  = 12.3 Hz, 2 H,

Ar-CH<sub>2</sub>-O), 4.69 (t,  $J = 3.5$  Hz, 1 H, O-CH-O), 3.93–3.89 (m, 1 H, -CH<sub>2</sub>-O), 3.89 (s, 3 H, -OCH<sub>3</sub>), 3.57–3.52 (m, 1 H, -CH<sub>2</sub>-O), 1.87–1.50 (m, 6 H, -CH<sub>2</sub>-).

<sup>13</sup>C NMR (CDCl<sub>3</sub>):  $\delta$  (ppm) = 158.15, 140.24, 139.26, 121.85, 110.39, 97.83 (O-CH-O), 84.59 (C<sub>Ar</sub>-I), 68.29, 62.31, 56.30, 30.57, 25.44, 19.41.

MS (Cl, 120 eV):  $m/z$  (%) = 391 (100), 348 (30, M<sup>+</sup>), 329 (4), 267 (2), 253 (15), 251 (2), 183 (2), 169 (45), 168 (8), 167 (22), 166 (5), 85 (2).

## **{2-Methoxy-4-[(tetrahydropyran-2-yloxy)methyl]phenyl}boronic acid (22)**

A solution of the iodoarene **21** (8.95 g, 25.7 mmol) in anhydrous THF (200 mL) was cooled to -78 °C, *n*-butyllithium in *n*-hexane (2.5 M, 12.5 mL, 31.1 mmol) was added dropwise at  $T < -70$  °C and stirring was continued for 30 min. Trimethyl borate (8.06 g, 8.58 mL, 77.3 mmol) was added at  $T < -70$  °C and the mixture was stirred for 1 h and then allowed to warm to room temperature. H<sub>2</sub>O (200 mL) was added and the mixture was extracted with Et<sub>2</sub>O (3 × 150 mL). From the organic layer the boronic acid was extracted with 2 M NaOH (3 × 100 mL) and the alkaline solution was slightly acidified with diluted HCl to pH 6–7. The boronic acid was re-extracted with Et<sub>2</sub>O (3 × 150 mL), dried (MgSO<sub>4</sub>) and concentrated; colorless oil, 4.20 g (61%).

IR:  $\nu$  (cm<sup>-1</sup>) = 3394 (OH), 2940, 2869, 1611, 1566, 1500, 1454, 1416, 1322, 1246, 1162, 1118, 1032, 976, 948, 904, 867, 814, 744.

<sup>1</sup>H NMR (CDCl<sub>3</sub>):  $\delta$  (ppm) = 7.81(d,  $J = 7.6$  Hz, 1 H, Ar-H), 7.02 (dd, not resolved,  $J_1 = 7.6$  Hz, 1 H, Ar-H), 6.95 (d, not resolved, 1 H, Ar-H), 5.91 (s, 2 H, -B(OH)<sub>2</sub>), 4.81, 4.54 (2 d,  $J = 12.6$  Hz, 2 H, Ar-CH<sub>2</sub>-O), 4.71 (t,  $J = 3.5$  Hz, 1 H, O-CH-O), 3.93 (s, 3 H, -OCH<sub>3</sub>), 3.75 (m, 1 H, -CH<sub>2</sub>-O), 3.56 (m, 1 H, -CH<sub>2</sub>-O), 1.87–1.53 (m, 6 H, -CH<sub>2</sub>-).

**$^{13}\text{C}$  NMR** ( $\text{CDCl}_3$ ):  $\delta$  (ppm) = 164.76, 143.72, 136.87, 120.36, 109.14, 97.92 (O-CH-O), 68.62, 62.30, 55.51, 30.59, 25.46, 19.42.

**MS** (Cl, 120 eV):  $m/z$  (%) = 238 (80), 221 (100), 169 (60), 137 (25), 85 (27).

### Vanillin triflate (**24**)

To a solution of vanillin (**23**) (3.40 g, 22.3 mmol) and pyridine (4.21 g, 53.4 mmol) in anhydrous  $\text{CH}_2\text{Cl}_2$  (150 mL) was added dropwise trifluoromethanesulfonic anhydride (12.6 g, 44.6 mmol) at 0 °C. The mixture was allowed to warm to room temperature and stirred for additional 5 h. Saturated  $\text{NaHCO}_3$  (200 mL) and  $\text{H}_2\text{O}$  (200 mL) were added and the mixture was extracted with EtOAc (3  $\times$  150 mL). The organic layer was dried ( $\text{MgSO}_4$ ) and concentrated. Purification by CC (silica gel pad,  $\text{CH}_2\text{Cl}_2$ ) yielded a colorless oil, 5.70 g (90%).

**IR**:  $\nu$  ( $\text{cm}^{-1}$ ) = 2984, 2853, 1725, 1692 (C=O), 1605, 1499, 1462, 1422, 1323, 1290, 1248, 1197, 1156, 1135, 1102, 1031, 923, 865, 837, 770, 754, 737, 713, 644, 613.

**$^1\text{H}$  NMR** ( $\text{CDCl}_3$ ):  $\delta$  (ppm) = 9.99 (s, 1 H, -CHO), 7.57 (d,  $J$  = 1.9 Hz, 1 H, Ar-H), 7.52 (dd,  $J_1$  = 8.2 Hz,  $J_2$  = 1.9 Hz, 1 H, Ar-H), 7.42 (d,  $J$  = 8.2 Hz, 1 H, Ar-H), 4.00 (s, 3 H, - $\text{OCH}_3$ ).

**$^{13}\text{C}$  NMR** ( $\text{CDCl}_3$ ):  $\delta$  (ppm) = 190.33 (-CHO), 152.29, 142.78, 136.85, 124.11, 123.24, 118.74 (q,  $J_{\text{C-F}}$  = 312 Hz), 111.84, 56.54.

**MS** (Cl, 120 eV):  $m/z$  (%) = 84 ( $\text{M}^+$ , 55), 238 (15), 179 (15), 151 (100), 137 (8), 95 (30), 79 (8).

## Trifluoromethanesulfonic acid 4-(1,3-dioxan-2-yl)-2-methoxyphenyl ester (25)

A mixture of vanillin triflate (**24**) (5.68 g, 20.0 mmol), triethyl orthoformate (3.27 g, 22.0 mmol, 3.65 mL), 1,3-propanediol (6.15 g, 80.0 mmol, 5.88 mL) and tetrabutylammonium tribromide (96.7 mg, 1.16 mmol) was stirred for 1 h at room temperature. The reaction mixture was taken up in EtOAc (100 mL), washed with saturated NaHCO<sub>3</sub> (2 × 50 mL) and H<sub>2</sub>O (3 × 50 mL), dried (MgSO<sub>4</sub>) and concentrated; colorless oil, 6.79 g (99%).

**IR:**  $\nu$  (cm<sup>-1</sup>) = 2858, 1725, 1610, 1503, 1466, 1417, 1378, 1311, 1286, 1247, 1202, 1138, 1100, 1023, 999, 882, 865, 821, 782.

**<sup>1</sup>H NMR** (CDCl<sub>3</sub>):  $\delta$  (ppm) = 7.22 (d,  $J$  = 1.9 Hz, 1 H, Ar-H), 7.20 (d,  $J$  = 8.2 Hz, 1 H, Ar-H), 7.08 (dd,  $J_1$  = 8.2 Hz,  $J_2$  = 1.9 Hz, 1 H, Ar-H), 5.48 (s, 1 H, -OCHO-), 4.30–4.25 (combined signals, 2 H, -OCH<sub>2</sub>-), 4.03–3.95 (combined signals, 2 H, -OCH<sub>2</sub>-), 3.93 (s, 3 H, -OCH<sub>3</sub>), 2.28–2.16 (m, 1 H, HCH), 1.49–1.44 (m, 1 H, HCH).

**<sup>13</sup>C NMR** (CDCl<sub>3</sub>):  $\delta$  (ppm) = 151.31, 140.14, 138.84, 122.17, 118.80 (q,  $J_{C-F}$  = 321 Hz), 118.72, 111.02, 100.39 (-OCHO-), 67.43, 56.23, 25.67.

## 2-[3-Methoxy-4-(4,4,5,5-tetramethyl-1,3,2-dioxaborolan-2-yl)phenyl]-1,3-dioxane (26)

To a solution of PdCl<sub>2</sub>(dppf) (487 mg, 0.60 mmol) in anhydrous 1,4-dioxane (120 mL) was added the triflate **25** (6.78 g, 19.8 mmol), triethylamine (8.34 mL, 59.5 mmol) and pinacolborane (2.53 g, 19.8 mmol) and the mixture was heated to 100 °C for 6 h. Additional pinacolborane (2.53 g, 19.8 mmol) was added and heating was continued

for 6 h. After cooling, the black reaction mixture was taken up in benzene (200 mL), washed with H<sub>2</sub>O (3 × 100 mL) and brine (100 mL), dried (MgSO<sub>4</sub>) and concentrated. Purification by CC (basic alumina, EtOAc/*n*-hexane 1:1) yielded a colorless oil, 3.46 g (55%).

**IR:**  $\nu$  (cm<sup>-1</sup>) = 2974, 2853, 1724, 1614, 1568, 1507, 1458, 1420, 1372, 1342, 1316, 1278, 1253, 1237, 1215, 1194, 1169, 1144, 1100, 1066, 1037, 996, 963, 951, 915, 894, 878, 856, 821, 786, 696.

**<sup>1</sup>H NMR** (CDCl<sub>3</sub>):  $\delta$  (ppm) = 7.65 (d, *J* = 7.6 Hz, 1 H, Ar-H), 7.02 (combined signals, 2 H, Ar-H), 5.48 (s, 1 H, -OCHO-), 4.30–4.25 (combined signals, 2 H, -OCH<sub>2</sub>-), 4.02–3.93 (combined signals, 2 H, -OCH<sub>2</sub>-), 3.85 (s, 3 H, -OCH<sub>3</sub>), 2.24 (m, 1 H, -HCH-), 1.45 (d, *J* = 13.6 Hz, 1 H, HCH), 1.34 (s, 12 H, -CH<sub>3</sub>).

**<sup>13</sup>C NMR** (CDCl<sub>3</sub>):  $\delta$  (ppm) = 164.37, 143.03, 136.74, 117.95, 108.01, 101.46 (-OCHO-), 83.43 (-OC(CH<sub>3</sub>)<sub>2</sub>), 67.40, 55.91, 25.79, 24.88, 24.83 (-OC(CH<sub>3</sub>)<sub>2</sub>).

**MS** (Cl, 120 eV): *m/z* (%) = 320 (M<sup>+</sup>, 100), 319 (55), 291 (22), 277 (5), 219 (6), 211 (35), 193 (45), 163 (8), 137 (2), 101 (4), 87 (17).

### **5'-(4'-Hydroxymethyl-4,2'-dimethoxybiphenyl-2-ylethynyl)-6,2'-dimethoxybiphenyl-3-carbaldehyde (27)**

The bromoalkyne **16** (1.10 g, 2.44 mmol) and the boronic acid **22** (0.97 g, 3.65 mmol) were dissolved in a mixture of toluene (165 mL), 1 M Na<sub>2</sub>CO<sub>3</sub> (35 mL) and EtOH (65 mL) and degassed with argon. Tetrakis(triphenylphosphane)-palladium(0) (138 mg, 118  $\mu$ mol) was added and the mixture was heated to reflux for 12 h, cooled to room temperature and filtered through a silica gel pad eluting with Et<sub>2</sub>O. H<sub>2</sub>O (65 mL) was added and the mixture was extracted with Et<sub>2</sub>O (3 × 80 mL). The combined organic layers were dried (MgSO<sub>4</sub>) and concentrated. The crude product was purified

filtrating through an alumina pad (basic, activity III) in  $\text{CH}_2\text{Cl}_2$ ; pale yellow oil which solidifies; 7.10 g (89%), mp 105 °C. The residue was taken up in 1,4-dioxane (60 mL) and hydrolyzed with 2 M HCl (35 mL) for 1 h at room temperature. The mixture was extracted with EtOAc ( $3 \times 50$  mL), washed ( $3 \times 100$  mL  $\text{H}_2\text{O}$ ), dried ( $\text{MgSO}_4$ ) and concentrated. The crude product was purified by CC (silica gel, EtOAc/*n*-hexane 1:1); pale yellow solid, 700 mg (56%), mp 67–70 °C

**IR:**  $\nu$  ( $\text{cm}^{-1}$ ) = 3359 (OH), 3001, 2933, 2836, 2207 ( $\text{C}\equiv\text{C}$ ), 2039, 1982, 1899, 1732, 1686 ( $\text{C}=\text{O}$ ), 1595, 1575, 1490, 1460, 1409, 1318, 1249, 1169, 1146, 1123, 1018, 901, 855, 811, 771.

**$^1\text{H}$  NMR** ( $\text{CDCl}_3$ ):  $\delta$  (ppm) = 9.92 (s, 1 H,  $-\text{CHO}$ ), 7.89 (dd,  $J_1 = 8.5$  Hz,  $J_2 = 2.2$  Hz, 1 H, Ar-H), 7.72 (d,  $J = 2.2$  Hz, 1 H, Ar-H), 7.33 (d,  $J = 7.6$  Hz, 1 H, Ar-H), 7.28 (d,  $J = 8.5$  Hz, 1 H, Ar-H), 7.25 (dd,  $J_1 = 8.5$  Hz,  $J_2 = 2.2$  Hz, 1 H, Ar-H), 7.12 (d,  $J = 2.5$  Hz, 1 H, Ar-H), 7.08 (combined signals, 2 H, Ar-H), 7.00 (d, not resolved, 1 H, Ar-H), 6.96 (dd, not resolved, 1 H, Ar-H), 6.92 (dd,  $J_1 = 8.5$  Hz,  $J_2 = 2.5$  Hz, 1 H, Ar-H), 6.86 (d,  $J = 8.5$  Hz, 1 H, Ar-H), 4.66 (s, 2 H,  $\text{Ar}-\text{CH}_2-\text{OH}$ ), 3.85 (s, 3 H,  $-\text{OCH}_3$ ), 3.85 (s, 3 H,  $-\text{OCH}_3$ ), 3.79 (s, 3 H,  $-\text{OCH}_3$ ), 3.75 (s, 3 H,  $-\text{OCH}_3$ ).

**$^{13}\text{C}$  NMR** ( $\text{CDCl}_3$ ):  $\delta$  (ppm) = 191.02 ( $-\text{CHO}$ ), 171.16, 162.14, 158.36, 157.33, 156.94, 141.80, 134.48, 134.52, 133.43, 132.76, 132.39, 131.99, 131.83, 131.31, 129.60, 128.94, 127.91, 126.51, 124.21, 118.34, 116.14, 115.62, 114.53, 110.88, 109.40, 91.45 ( $-\text{C}\equiv\text{C}-$ ), 88.41 ( $-\text{C}\equiv\text{C}-$ ), 65.31 ( $\text{Ar}-\text{CH}_2-\text{OH}$ ), 56.00, 55.74, 55.69, 55.39.

**MS** (CI, 120 eV):  $m/z$  (%) = 508 (5,  $\text{M}^+$ ), 404 (5), 279 (35), 277 (25), 274 (60), 257 (25), 214 (10), 163 (100), 154 (90), 137 (75), 85 (40).

**5'-(4,2'-Dimethoxy-4'-formylbiphenyl-2-ylethynyl)-6,2'-  
dimethoxybiphenyl-3-carbaldehyde (28)**

(a) by oxidation of **27**:

To a suspension of PCC on alumina (638 mg, 638  $\mu$ mol, 1 mmol/g) in anhydrous  $\text{CH}_2\text{Cl}_2$  (30 mL) was added the benzyl alcohol **27** (216 mg, 0.43 mmol) in  $\text{CH}_2\text{Cl}_2$  (20 mL) with vigorous stirring for 24 h at room temperature. The slurry was filtered off rewashing with  $\text{CH}_2\text{Cl}_2$  (20 mL) and concentrated. Purification by CC (silica gel, EtOAc/*n*-hexane (1:1) yielded a colorless solid, 183 mg (85%).

(b) by Suzuki reaction of **16** und **26**:

The bromoalkyne **16** (568 mg, 1.26 mmol) and the boronic ester **26** (1.00 g, 3.12 mmol) were dissolved in toluene (15 mL) an EtOH (3 mL) and degassed with argon.  $\text{Na}_2\text{CO}_3$  (1.20 g, 11.4 mmol) in degassed  $\text{H}_2\text{O}$  (6 mL) and  $\text{Pd}(\text{PPh}_3)_4$  (72.2 mg, 63.0  $\mu$ mol) were added and the mixture was heated to reflux for 12 h. After cooling to room temperature  $\text{H}_2\text{O}$  (20 mL) was added and the mixture was extracted with  $\text{Et}_2\text{O}$  (3  $\times$  25 mL). The combined organic layers were dried ( $\text{MgSO}_4$ ) and concentrated. The residue was taken up in 1,4-dioxane (20 mL) and hydrolyzed with 2 M HCl (10 mL) for 1 h at room temperature. The mixture was extracted with EtOAc (3  $\times$  15 mL), washed (3  $\times$  30 mL  $\text{H}_2\text{O}$ ), dried ( $\text{MgSO}_4$ ) and concentrated. The crude product was purified by CC (silica gel, EtOAc/*n*-hexane 1:1); colorless solid, 469 mg (73%), mp 76–78  $^\circ\text{C}$ ; HPLC: Nucleosil 100-5, 4.0  $\times$  250 mm, EtOAc/*n*-hexane 30:70.

**IR:**  $\nu$  ( $\text{cm}^{-1}$ ) = 2938, 2836, 2204 (C $\equiv$ C), 1685 (C=O), 1594, 1574, 1488, 1459, 1416, 1385, 1249, 1170, 1148, 1123, 1099, 1020, 1000, 958, 813.

**$^1\text{H}$  NMR** ( $\text{CDCl}_3$ ):  $\delta$  (ppm) = 9.96 (s, 1 H, –CHO), 9.91 (s, 1 H, –CHO), 7.88 (dd,  $J_1$  = 8.5 Hz,  $J_2$  = 2.2 Hz, 1 H, Ar-H), 7.71 (d,  $J$  = 2.2 Hz, 1 H, Ar-H), 7.56 (d,  $J$  = 7.6 Hz, 1 H, Ar-H), 7.50 (dd,  $J_1$  = 7.6 Hz,  $J_2$  = 1.6 Hz, 1 H, Ar-H), 7.48 (d,  $J$  = 1.6 Hz, 1 H, Ar-



H), 7.29 (d,  $J = 8.5$  Hz, 1 H, Ar-H), 7.18 (dd,  $J_1 = 8.5$  Hz,  $J_2 = 2.2$  Hz, 1 H, Ar-H), 7.13 (d,  $J = 2.8$  Hz, 1 H, Ar-H), 7.09 (d,  $J = 2.2$  Hz, 1 H, Ar-H), 7.06 (d,  $J = 8.5$  Hz, 1 H, Ar-H), 6.94 (dd,  $J_1 = 8.5$  Hz,  $J_2 = 2.8$  Hz, 1 H, Ar-H), 6.85 (d,  $J = 8.5$  Hz, 1 H, Ar-H), 3.86 (s, 3 H,  $-\text{OCH}_3$ ), 3.85 (s, 3 H,  $-\text{OCH}_3$ ), 3.84 (s, 3 H,  $-\text{OCH}_3$ ), 3.75 (s, 3 H,  $-\text{OCH}_3$ ).

$^{13}\text{C}$  NMR ( $\text{CDCl}_3$ ):  $\delta$  (ppm) = 191.93, 190.84 (2-CHO), 162.03, 158.95, 157.87, 157.12, 136.94, 136.58, 134.41, 133.01, 132.45, 132.37, 132.25, 131.73, 131.00, 129.64, 127.62, 126.64, 124.16, 123.73, 116.41, 115.21, 114.58, 111.04, 110.96, 109.33, 92.02 ( $-\text{C}\equiv\text{C}-$ ), 87.80 ( $-\text{C}\equiv\text{C}-$ ), 55.99, 55.88, 55.76, 55.43.

MS (CI, 120 eV):  $m/z$  (%) = 507 (7,  $\text{M}^+$ ), 506 (9), 405 (6), 377 (75), 376 (100), 285 (8), 272 (60), 270 (80), 202 (8), 137 (5), 89 (8), 88 (18).

### **(Z)-5'-[2-(4'-Formyl-4,2'-dimethoxybiphenyl-2-yl)-vinyl]-6,2'-dimethoxybiphenyl-3-carbaldehyde (29)**

The alkyne **28** (200 mg, 0.40 mmol) was dissolved in EtOAc (50 mL) and Lindlar catalyst (5% Pd on  $\text{CaCO}_3$ , poisoned with  $\text{Pb}(\text{OAc})_2$ ; 168 mg, 78.7  $\mu\text{mol}$ ) as well as two drops of quinoline were added. The Parr hydrogenation apparatus was flushed several times with hydrogen and hydrogenation was performed for 2 h at 1.5 bar (20 psi). The catalyst was filtered off and the solvent removed *in vacuo*. The crude product was purified by CC (silica gel, EtOAc/*n*-hexane 2:1) yielding a pale yellow oil which solidifies on standing; 191 mg (95%), mp 50 °C; HPLC: Nucleosil 100-5, 4.0  $\times$  250 mm, EtOAc/*n*-hexane 30:70.

IR:  $\nu$  ( $\text{cm}^{-1}$ ) = 3002, 2936, 2834, 2726, 1684 (C=O), 1595, 1573, 1499, 1460, 1414, 1384, 1264, 1246, 1229, 1194, 1178, 1165, 1150, 1120, 1021, 1000, 958, 809, 735.

$^1\text{H}$  NMR ( $\text{CDCl}_3$ ):  $\delta$  (ppm) = 9.97 (s, 1 H,  $-\text{CHO}$ ), 9.88 (s, 1 H,  $-\text{CHO}$ ), 7.85 (dd,  $J_1 = 8.5$  Hz,  $J_2 = 2.2$  Hz, 1 H, Ar-H), 7.59 (d,  $J = 1.9$  Hz, 1 H, Ar-H), 7.40 (combined

signals, 2 H, Ar-H), 7.25 (d,  $J = 7.3$  Hz, 1 H, Ar-H), 7.20 (d,  $J = 8.5$  Hz, 1 H, Ar-H), 7.17 (dd,  $J_1 = 8.5$  Hz,  $J_2 = 2.2$  Hz, 1 H, Ar-H), 7.03 (d,  $J = 8.5$  Hz, 1 H, Ar-H), 7.03 (d,  $J = 2.2$  Hz, 1 H, Ar-H), 6.94 (d,  $J = 2.5$  Hz, 1 H, Ar-H), 6.87 (dd,  $J_1 = 8.5$  Hz,  $J_2 = 2.5$  Hz, 1 H, Ar-H), 6.80 (d,  $J = 8.5$  Hz, 1 H, Ar-H), 6.36 (d,  $J = 12.0$  Hz, 1 H, CH=CH, *cis*), 6.23 (d,  $J = 12.0$  Hz, 1 H, CH=CH, *cis*), 3.83 (s, 3 H, –OCH<sub>3</sub>), 3.74 (s, 3 H, –OCH<sub>3</sub>), 3.72 (s, 3 H, –OCH<sub>3</sub>), 3.71 (s, 3 H, –OCH<sub>3</sub>).

<sup>13</sup>C NMR (CDCl<sub>3</sub>):  $\delta$  (ppm) = 191.96, 190.90 (2-CHO), 162.10, 159.02, 157.57, 156.15, 138.39, 136.96, 136.71, 133.35, 132.05, 131.92, 131.28, 131.20, 129.72, 129.61, 129.51, 129.38, 129.28, 128.50, 128.19, 126.11, 124.01, 114.38, 113.10, 110.81, 110.64, 109.01, 55.88, 55.72, 55.45, 55.23.

### **(E)-5'-[2-(4'-Formyl-4,2'-dimethoxybiphenyl-2-yl)-vinyl]-6,2'-dimethoxybiphenyl-3-carbaldehyde (30)**

The *cis*-stilbene **29** (200 mg, 0.39 mmol) was dissolved in anhydrous THF (10 mL), diphenyl disulfide (17.2 mg, 78.6  $\mu$ mol) was added and the mixture was heated to reflux for 24 h. Additional Ph–S–S–Ph (11.0 mg, 50.0  $\mu$ mol) was added and heating was continued for 2 h. The solvent was removed *in vacuo* and the residue was purified by CC (silica gel, EtOAc/*n*-hexane 1:1); pale yellow solid, 170 mg (85%), mp 72–76 °C; HPLC: Nucleosil 100-5, 4.0  $\times$  250 mm, EtOAc/*n*-hexane 30:70.

**IR:**  $\nu$  (cm<sup>-1</sup>) = 3001, 2936, 2834, 2727, 2359, 2342, 1683 (C=O), 1595, 1573, 1499, 1485, 1460, 1414, 1384, 1264, 1247, 1230, 1195, 1178, 1165, 1150, 1120, 1021, 1000, 958, 809, 736.

<sup>1</sup>H NMR (CDCl<sub>3</sub>):  $\delta$  (ppm) = 10.01 (s, 1 H, –CHO), 9.90 (s, 1 H, –CHO), 7.87 (dd,  $J_1 = 8.5$  Hz,  $J_2 = 2.2$  Hz, 1 H, Ar-H), 7.75 (d,  $J = 2.2$  Hz, 1 H, Ar-H), 7.50 (combined signals, 2 H, Ar-H), 7.36 (d,  $J = 7.6$  Hz, 1 H, Ar-H), 7.31 (dd,  $J_1 = 8.5$  Hz,  $J_2 = 2.2$  Hz,

1 H, Ar-H), 7.27 (d,  $J = 2.5$  Hz, 1 H, Ar-H), 7.19 (combined signals, 2 H, Ar-H), 7.05 (d,  $J = 8.5$  Hz, 1 H, Ar-H), 6.98 (d,  $J = 16.1$  Hz, 1 H, *trans*-CH=CH), 6.90 (d,  $J = 8.8$  Hz, 1 H, Ar-H), 6.89 (dd,  $J_1 = 8.5$  Hz,  $J_2 = 2.5$  Hz, 1 H, Ar-H), 6.71 (d,  $J = 16.1$  Hz, 1 H, *trans*-CH=CH), 3.90 (s, 3 H, -OCH<sub>3</sub>), 3.83 (s, 3 H, -OCH<sub>3</sub>), 3.81 (s, 3 H, -OCH<sub>3</sub>), 3.75 (s, 3 H, -OCH<sub>3</sub>).

<sup>13</sup>C NMR (CDCl<sub>3</sub>):  $\delta$  (ppm) = 191.98, 190.91 (2-CHO), 162.08, 159.50, 157.69, 156.73, 137.45, 136.92, 136.66, 133.10, 132.66, 131.54, 129.99, 129.82, 129.58, 129.16, 128.98, 128.22, 127.80, 127.13, 126.52, 125.48, 124.16, 113.10, 111.29, 110.91, 110.02, 109.27, 55.98, 55.85, 55.81, 55.34.

MS (Cl, 120 eV):  $m/z$  (%) = 508 (100, M<sup>+</sup>), 374 (10), 324 (3), 286 (8), 272 (20), 270 (25), 255 (28), 239 (5), 225 (3), 155 (10).

### Preparation of TiCl<sub>3</sub>(DME)<sub>2</sub>

Titanium(III) chloride (25.0 g, 16.2 mmol) was suspended in dimethoxyethane (350 mL) under argon atmosphere and heated to reflux for 2 d. After cooling, the precipitate was filtered off under argon and was washed with *n*-pentane (50 mL) and dried *in vacuo*. The product (blue crystals) was used for the following McMurry protocols.

### Macrocycle 7 ((*Z*)-stilbene + tolane bridges)

To TiCl<sub>3</sub>(DME)<sub>2</sub> (513 mg, 1.52 mmol) in anhydrous dimethoxyethane (50 mL) under argon atmosphere was added zinc dust (367 mg, 5.61 mmol) and the mixture was heated to reflux for 2 h. The tolane dialdehyde **28** (86.0 mg, 170  $\mu$ mol) in anhydrous dimethoxyethane (50 mL) was added dropwise within 3 h and the mixture was heated again to reflux for 16 h. The mixture was cooled, 6 M HCl (100 mL) was added and

extracted with Et<sub>2</sub>O (3 × 100 mL). The combined organic layers were washed with H<sub>2</sub>O to pH 7 (~100 mL), dried (MgSO<sub>4</sub>) and concentrated. The crude product was purified by CC (silica gel, CH<sub>2</sub>Cl<sub>2</sub>) yielding a colorless solid; 40 mg (50%); mp 120 °C; HPLC: Nucleosil 100-5, 4.0 × 250 mm, EtOAc/*n*-hexane 20:80.

**IR:**  $\nu$  (cm<sup>-1</sup>) = 2999, 2927, 2832, 2196 (–C≡C–), 1724, 1595, 1555, 1502, 1460, 1408, 1311, 1266, 1246, 1179, 1125, 1104, 1024, 965, 906, 867, 809, 730, 709, 658, 609.

**<sup>1</sup>H NMR** (CDCl<sub>3</sub>, 25 °C):  $\delta$  (ppm) = 7.35 (not resolved, 1 H, Ar-H), 7.30 (not resolved, 0.50 H, Ar-H), 7.25–7.08 (combined signals, 2.70 H, Ar-H; incl. dd,  $J_1$  = 8.5 Hz,  $J_2$  = 2.2 Hz), 7.03 (d,  $J$  = 1.9 Hz, 1.50 H, Ar-H), 6.98–6.82 (combined signals, 5.00 H, Ar-H), 6.78 (d,  $J$  = 8.5 Hz, 1.20 H, Ar-H), 6.62 (not resolved, 2 H, *cis*-CH=CH), 3.84 (s, 3 H, –OCH<sub>3</sub>), 3.83 (s, 3 H, –OCH<sub>3</sub>), 3.81 (s, 3 H, –OCH<sub>3</sub>) 3.71 + 3.53 (2 s, 1.42 + 1.58 H, –OCH<sub>3</sub>, signals of two conformers).

**<sup>13</sup>C NMR** (CDCl<sub>3</sub>, 25 °C):  $\delta$  (ppm) = 158.45, 158.41, 157.02, 156.38, 141.31, 139.44, 135.78, 134.69, 132.15, 130.89, 129.57, 129.03, 128.80, 128.72, 128.13, 126.69, 125.52, 115.83, 114.60, 114.56, 114.54, 114.52, 114.50, 114.48, 114.42, 114.32, 114.30, 114.29, 114.27, 114.26, 114.23, 114.20, 114.19, 114.15, 114.13, 114.11, 114.09, 114.08, 111.10, 111.05, 111.04, 111.98, 91.85 (–C≡C–), 91.83 (–C≡C–), 55.82, 55.75, 55.33 (2 signals).

**<sup>1</sup>H NMR** ([D<sub>6</sub>]-DMSO, 25 °C):  $\delta$  (ppm) = 7.31 (d,  $J$  = 7.6 Hz, 1 H, Ar-H), 7.23 (combined signals, 1.50 H, Ar-H; incl. dd,  $J_1$  = 8.5 Hz,  $J_2$  = 2.2 Hz), 7.17–7.08 (combined signals, 2.40 H, Ar-H; incl. d,  $J$  = 2.2 Hz), 7.02 (combined signals, 2.40 H, Ar-H), 6.95 (combined signals, 2.40 H, Ar-H; incl. d,  $J$  = 8.5 Hz), 6.90–6.73 (combined signals, 2.30 H, Ar-H), 6.68 (d,  $J$  = 12.0 Hz, 1 H, *cis*-CH=CH), 6.62 (d,  $J$  =

12.0 Hz, 1 H, *cis*-CH=CH), 3.80 (s, 3 H, -OCH<sub>3</sub>), 3.77 (s, 3 H, -OCH<sub>3</sub>), 3.76 (s, 3 H, -OCH<sub>3</sub>), 3.67 + 3.41 (2 s<sub>br</sub>, 1.80 H + 1.20 H, -OCH<sub>3</sub>, signals of two conformers).

**<sup>1</sup>H NMR** ([D<sub>6</sub>]-DMSO, 75 °C):  $\delta$  (ppm) = 7.30 (dd,  $J_1 = 8.5$  Hz,  $J_2 = 2.1$  Hz, 1 H, Ar-H), 7.21 (dd,  $J_1 = 8.5$  Hz,  $J_2 = 2.1$  Hz, 1 H, Ar-H), 7.18 (combined signals, 2 H, Ar-H), 7.13 (d,  $J = 8.5$  Hz, 1 H, Ar-H), 7.03 (combined signals, 2 H, Ar-H), 6.95 (dd,  $J_1 = 8.2$  Hz,  $J_2 = 2.7$  Hz, 1 H, Ar-H), 6.94 (d,  $J = 8.5$  Hz, 1 H, Ar-H), 6.90–6.86 (combined signals, 2 H, Ar-H), 6.82 (d,  $J = 1.8$  Hz, 1 H, Ar-H), 6.68 (d,  $J = 11.9$  Hz, 1 H, *cis*-CH=CH), 6.64 (d,  $J = 11.9$  Hz, 1 H, *cis*-CH=CH), 3.82 (s, 3 H, -OCH<sub>3</sub>), 3.79 (s, 3 H, -OCH<sub>3</sub>), 3.78 (s, 3 H, -OCH<sub>3</sub>), 3.56 (s, 3 H, -OCH<sub>3</sub>).

The rotation barrier was approximated to ~ 70 kJ/mol (see calculation method for compound 3).

**<sup>13</sup>C NMR** ([D<sub>6</sub>]-DMSO, 75 °C):  $\delta$  (ppm) = 157.94, 157.02, 156.79 (broad), 155.97, 139.85, 138.89, 134.28, 133.24, 131.35, 131.23, 129.14, 128.99, 128.54, 128.44, 128.27 (br), 128.13, 127.41, 126.01, 124.39, 123.19, 119.93 (br), 114.42, 114.04, 113.89, 111.71, 111.59, 111.44 (broad), 92.25 (-C≡C-), 91.44 (-C≡C-), 55.45, 55.31, 55.11 (broad), 54.97.

**MS** (CI, 120 eV):  $m/z$  (%) = 474 (53, M<sup>+</sup>), 473 (100), 472 (49), 459 (21), 458 (26), 443 (4), 442 (36), 421 (5), 414 (9), 384 (18), 342 (3), 324 (3), 198 (7), 197 (12), 179 (4).

### Macrocycle 5 (two (*Z*)-stilbene bridges)

To TiCl<sub>3</sub>(DME)<sub>2</sub> (513 mg, 1.52 mmol) in anhydrous dimethoxyethane (50 mL) under argon atmosphere was added zinc dust (367 mg, 5.61 mmol) and the mixture was heated to reflux for 2 h. The (*Z*)-stilbene dialdehyde **29** (90.0 mg, 177 μmol) in anhydrous dimethoxyethane (50 mL) was added dropwise within 3 h and the mixture was heated again to reflux for 16 h. The mixture was cooled, 6 M HCl (100 mL) was

added and extracted with Et<sub>2</sub>O (3 × 100 mL). The combined organic layers were washed with H<sub>2</sub>O to pH 7 (~100 mL), dried (MgSO<sub>4</sub>) and concentrated. The crude product was purified by CC (silica gel, CH<sub>2</sub>Cl<sub>2</sub>) and furthermore by preparative HPLC (Lichrospher 100 diol, 10 × 250 mm, EtOAc/*n*-hexane 10:90) yielding a colorless solid; 30 mg (36%); mp 105 °C; HPLC: Nucleosil 100-5, 4.0 × 250 mm, EtOAc/*n*-hexane 20:80.

**IR:**  $\nu$  (cm<sup>-1</sup>) = 2998, 2929, 2832, 1722, 1598, 1566, 1548, 1500, 1460, 1409, 1386, 1313, 1264, 1244, 1172, 1125, 1105, 1028, 999, 962, 903, 866, 841, 813, 795, 758.

**<sup>1</sup>H NMR** (CDCl<sub>3</sub>, 25 °C):  $\delta$  (ppm) = 7.15–7.00 (combined signals, 2 H, Ar-H; incl. 7.09 dd,  $J_1 = 8.5$  Hz,  $J_2 = 2.4$  Hz), 6.95–6.70 (combined signals, 7 H, 5 Ar-H, 2 *cis*-CH=CH; incl. 6.81 d,  $J = 8.5$  Hz, Ar-H), 6.75 d,  $J = 11.6$  Hz, *cis*-CH=CH, 6.73 d,  $J = 11.3$  Hz, *cis*-CH=CH), 6.65–6.40 (combined signals, 7 H, 5 Ar-H, 2 *cis*-CH=CH; incl. 6.81 d,  $J = 2.4$  Hz, Ar-H), 6.75 d,  $J = 11.6$  Hz, *cis*-CH=CH), 3.87 (s, 3 H, -OCH<sub>3</sub>), 3.84 (s, 3 H, -OCH<sub>3</sub>), 3.67 (s, 3 H, -OCH<sub>3</sub>), 3.89–3.80, 3.50–3.39, 3.15–3.00 (3 s, 2.10 H + 0.20 H + 0.70 H, -OCH<sub>3</sub>, signals of two conformers).

**<sup>13</sup>C NMR** (CDCl<sub>3</sub>, 25 °C):  $\delta$  (ppm) = 158.27 (br), 158.25 (br), 156.94 (br), 156.58, 155.36 (br), 139.83 (br), 138.72 (br), 138.99 (br), 138.93 (br), 138.92 (br), 138.89 (br), 138.86 (br), 138.62 (br), 138.60 (br), 132.81 (br), 132.01 (br), 131.72 (br), 131.68 (br), 131.24, 130.56, 129.65–128.56 (br), 128.25 (br), 127.78 (br), 126.60, 121.79 (br), 115.04 (br), 114.90, 112.63, 111.08, 110.36, 109.73 (br), 55.96, 55.85 (br), 55.27, 55.12 (br).

**<sup>1</sup>H NMR** ([D<sub>6</sub>]-DMSO, 25 °C):  $\delta$  (ppm) = 7.60–6.30 (combined signals, 16 H, 12 Ar-H and 4 *cis*-CH=CH), 3.80 (s, 3 H, -OCH<sub>3</sub>), 3.72 (s, 3 H, -OCH<sub>3</sub>), 3.57 (s, 3 H, -OCH<sub>3</sub>), 3.94–3.65, 3.06–2.85 (2 s, 2.30 H + 0.70 H, -OCH<sub>3</sub>, signals of two conformers).

**<sup>1</sup>H NMR** ([D<sub>6</sub>]-DMSO, 75 °C):  $\delta$  (ppm) = 7.12 (dd,  $J_1 = 8.2$  Hz,  $J_2 = 2.4$  Hz, 1 H, Ar-H), 7.09 (d,  $J = 8.5$  Hz, 1 H, Ar-H), 6.87 (d,  $J = 8.5$  Hz, 1 H, Ar-H), 6.86 (d,  $J = 2.4$  Hz, 1 H, Ar-H), 6.81 (dd,  $J_1 = 8.5$  Hz,  $J_2 = 2.7$  Hz, 1 H, Ar-H), 6.73 (d,  $J = 11.6$  Hz, 1 H, *cis*-CH=CH), 6.71 (d,  $J = 11.8$  Hz, 1 H, *cis*-CH=CH), 6.74–6.59 (combined signals, 4 H, Ar-H), 6.53 (combined signals, 2 H: d,  $J = 11.6$  Hz, 1 H, *cis*-CH=CH + 1 H, Ar-H), 6.48 (d,  $J = 2.4$  Hz, 1 H, Ar-H), 6.44 (d,  $J = 12.2$  Hz, 1 H, *cis*-CH=CH), 6.31 (not resolved, 1 H, Ar-H), 3.82 (s, 3 H, –OCH<sub>3</sub>), 3.74 (s, 3 H, –OCH<sub>3</sub>), 3.60 (s, 3 H, –OCH<sub>3</sub>), 3.54 (s<sub>br</sub>, 3 H, –OCH<sub>3</sub>).

The rotation barrier was approximated to ~ 70 kJ/mol (see calculation method for compound 3).

**<sup>13</sup>C NMR** ([D<sub>6</sub>]-DMSO, 75 °C):  $\delta$  (ppm) = 157.63, 156.50, 156.21, 155.08, 139.01, 137.39 (br), 132.31 (br), 132.29 (br), 131.02, 130.90, 130.26 (br), 129.78, 129.29, 128.96, 128.64, 128.50, 127.68, 126.99, 126.25, 120.20 (br), 114.53, 112.13, 111.38, 110.65, 55.41, 55.32, 54.82, 54.78.

**MS** (CI, 120 eV):  $m/z$  (%) = 476 (20, M<sup>+</sup>), 475 (17), 447 (100), 299 (33), 261 (17), 158 (1), 135 (3), 112 (4).

## Macrocycle 6 (*E* and *Z*)-stilbene bridges)

To TiCl<sub>3</sub>(DME)<sub>2</sub> (513 mg, 1.52 mmol) in anhydrous dimethoxyethane (50 mL) under argon atmosphere was added zinc dust (367 mg, 5.61 mmol) and the mixture was heated to reflux for 2 h. The (*E*)-stilbene dialdehyde **30** (80.0 mg, 157  $\mu$ mol) in anhydrous dimethoxyethane (50 mL) was added dropwise within 3 h and the mixture was heated again to reflux for 16 h. The mixture was cooled, 6 M HCl (100 mL) was added and extracted with Et<sub>2</sub>O (3  $\times$  100 mL). The combined organic layers were washed with H<sub>2</sub>O to pH 7 (~100 mL), dried (MgSO<sub>4</sub>) and concentrated. The crude

product was purified by CC (silica gel, CH<sub>2</sub>Cl<sub>2</sub>) yielding a colorless solid; 40 mg (53%); mp 104°C; HPLC: Nucleosil 100-5, 4.0 × 250 mm, EtOAc/*n*-hexane 20:80.

**IR:**  $\nu$  (cm<sup>-1</sup>) = 2935, 2834, 2727, 2042, 1684, 1595, 1573, 1499, 1460, 1414, 1384, 1247, 1149, 1120, 1021, 1000, 958, 900, 867, 809, 781, 736.

**<sup>1</sup>H NMR** (CDCl<sub>3</sub>, 25 °C):  $\delta$  (ppm) = 7.33 (d, *J* = 8.2 Hz, 0.45 H, Ar-H), 7.27 (combined signals, 0.94 H, Ar-H), 7.25–7.23 (combined signals, 1.18 H, Ar-H), 7.19 (d, *J* = 2.5 Hz, 0.69 H, Ar-H), 7.16 (d, *J* = 2.2 Hz, 0.55 H, Ar-H), 7.14 (d, *J* = 2.5 Hz, 0.55 H, Ar-H), 7.10 (d, *J* = 7.3 Hz, 0.65 H, Ar-H), 7.02 (d, *J* = 9.5 Hz, 1.65 H, Ar-H), 6.98 (not resolved, 0.58 H, Ar-H), 6.96 (d, *J* = 2.2 Hz, 0.58 H, Ar-H), 6.94 (combined signals, 0.94 H, Ar-H), 6.92 (combined signals, 1.33 H, Ar-H), 6.89–6.86 (combined signals, 1.59 H, Ar-H), 6.81 (d, *J* = 8.2 Hz, 1.20 H, Ar-H), 6.65 (d, *J* = 12.3 Hz, 0.55 H, *cis*-CH=CH), 6.63 (d, *J* = 12.3 Hz, 0.45 H, *cis*-CH=CH), 6.59 (d, *J* = 12.3 Hz, 1 H, *cis*-CH=CH), 6.51 (d, *J* = 16.1 Hz, 0.66 H, *trans*-CH=CH), 6.45 (d, *J* = 16.1 Hz, 0.46 H, *trans*-CH=CH), 3.88 (s, 3 H, –OCH<sub>3</sub>), 3.84 + 3.83 (2 s, 1.85 H + 1.15 H, –OCH<sub>3</sub>, signals of two conformers), 3.80 (s, 3 H, –OCH<sub>3</sub>), 3.72 + 3.44 (2 s, 1.39 H + 1.61 H, –OCH<sub>3</sub>, signals of two conformers).

**<sup>13</sup>C NMR** (CDCl<sub>3</sub>, 25 °C):  $\delta$  (ppm) = 159.18, 159.07, 157.64, 156.89, 156.41, 156.37, 139.20, 138.86, 136.98, 136.07, 133.99, 133.68, 133.63, 133.47, 133.12, 133.08, 132.80, 132.52, 132.28, 131.67, 131.40, 131.10, 130.97, 130.88, 130.66, 130.14, 129.82, 129.65, 129.47, 129.40, 129.30, 129.26, 128.80, 128.55, 128.45, 128.38, 127.97, 127.85, 127.80, 127.00, 126.85, 126.55, 126.59, 125.55, 121.13, 120.02, 113.23, 112.98, 111.60, 110.96, 110.89, 110.73, 110.56, 110.35, 108.44, 108.38, 55.91, 55.85, 55.69, 55.67, 55.60, 55.43, 55.27 (2 signals).

**<sup>1</sup>H NMR** ([D<sub>6</sub>]-DMSO, 25 °C):  $\delta$  (ppm) = 7.34–7.27 (combined signals, 2 H, Ar-H), 7.24–7.17 (combined signals, 2.50 H, Ar-H), 7.15–7.09 (combined signals, 1 H, Ar-



H), 7.06–7.01 (combined signals, 1.50 H, Ar-H), 6.98–6.94 (combined signals, 2 H, Ar-H), 6.91 (d,  $J = 8.5$  Hz, 1 H, Ar-H), 6.89–6.78 (combined signals, 3 H, Ar-H), 6.66 (d,  $J = 12.5$  Hz, 1 H, *cis*-CH=CH), 6.63 (d,  $J = 12.2$  Hz, 1 H, *cis*-CH=CH), 6.34 (d,  $J = 16.1$  Hz, 0.60 H, *trans*-CH=CH), 6.30 (d,  $J = 16.1$  Hz, 0.40 H, *trans*-CH=CH), 3.83 (s, 3 H, –OCH<sub>3</sub>), 3.77 + 3.75 (2 s, 1.70 H + 1.30 H, –OCH<sub>3</sub>, signals of two conformers), 3.72 (s, 3 H, –OCH<sub>3</sub>), 3.66 + 3.34 (2 s, 1.50 H + 1.50 H, –OCH<sub>3</sub>, signals of two conformers).

**<sup>1</sup>H NMR** ([D<sub>6</sub>]-DMSO, 75 °C):  $\delta$  (ppm) = 7.30 (dd,  $J_1 = 8.2$  Hz,  $J_2 = 2.1$  Hz, 1 H, Ar-H), 7.27 (d,  $J = 1.5$  Hz, 1 H, Ar-H), 7.22 (d,  $J = 8.2$  Hz, 1 H, Ar-H), 7.17 (dd,  $J_1 = 8.2$  Hz,  $J_2 = 2.4$  Hz, 1 H, Ar-H), 7.08 (d,  $J = 16.5$  Hz, 1 H, *trans*-CH=CH), 7.06–7.00 (not resolved, 1 H, Ar-H), 7.04 (d,  $J = 8.5$  Hz, 1 H, Ar-H), 7.02 (d,  $J = 2.1$  Hz, 1 H, Ar-H), 6.91 (d,  $J = 8.5$  Hz, 1 H, Ar-H), 6.88 (dd,  $J_1 = 8.2$  Hz,  $J_2 = 2.7$  Hz, 1 H, Ar-H), 6.85 (d,  $J = 2.4$  Hz, 1 H, Ar-H), 7.00–6.82 (not resolved, 2 H, Ar-H), 6.68 (d,  $J = 12.2$  Hz, 1 H, *cis*-CH=CH), 6.63 (d,  $J = 12.2$  Hz, 1 H, *cis*-CH=CH), 6.40 (d,  $J = 16.1$  Hz, 1 H, *trans*-CH=CH), 3.85 (s, 3 H, –OCH<sub>3</sub>), 3.78 (s, 3 H, –OCH<sub>3</sub>), 3.74 (s, 3 H, –OCH<sub>3</sub>), 3.65–3.30 (s<sub>br</sub>, 3 H, –OCH<sub>3</sub>)

The rotation barrier was approximated to ~ 70 kJ/mol (see calculation method for compound 3).

**<sup>13</sup>C NMR** ([D<sub>6</sub>]-DMSO, 75 °C):  $\delta$  (ppm) = 158.62, 157.10, 156.52, 156.02, 136.01, 132.45, 132.38, 131.27, 130.88, 129.87, 129.32, 128.35, 128.05, 127.82, 127.55, 127.48, 126.49, 125.26, 120.86, 112.95, 111.42, 111.12, 108.06, 55.40, 55.23, 55.01 (br), 54.87.

**MS** (CI, 120 eV):  $m/z$  (%) = 476 (19, M<sup>+</sup>), 475 (100), 461 (49), 444 (2), 429 (12), 324 (2), 162 (4).

## 5'-[2-(4'-Formyl-4,2'-dimethoxybiphenyl-2-yl)ethyl]-6,2'-dimethoxybiphenyl-3-carbaldehyde (31)

The alkyne **28** (410 mg, 0.81 mmol) was dissolved in EtOAc (50 mL) and Lindlar catalyst (5 % Pd on CaCO<sub>3</sub>, poisoned with Pb(OAc)<sub>2</sub>; 344 mg, 161 μmol) as well as two drops of quinoline were added. The Parr hydrogenation apparatus was flushed several times with hydrogen and hydrogenation was performed for 5 h at 3.5 bar (~50 psi). The catalyst was filtered off and the solvent removed *in vacuo*. The crude product was purified by CC (silica gel, EtOAc/*n*-hexane 2:1) yielding a pale yellow oil which solidifies on standing; 391 mg (95%), mp 74–76 °C; HPLC: Nucleosil 100-5, 4.0 × 250 mm, EtOAc/*n*-hexane 30:70.

**IR:**  $\nu$  (cm<sup>-1</sup>) = 3001, 2935, 2834, 2728, 1684 (C=O), 1595, 1499, 1460, 1414, 1384, 1264, 1247, 1194, 1178, 1165, 1150, 1120, 1021, 1000, 958, 900, 868, 809, 736.

**<sup>1</sup>H NMR** (CDCl<sub>3</sub>):  $\delta$  (ppm) = 9.96 (s, 1 H, -CHO), 9.90 (s, 1 H, -CHO), 7.84 (dd,  $J_1$  = 8.5 Hz,  $J_2$  = 2.2 Hz, 1 H, Ar-H), 7.66 (d,  $J$  = 2.2 Hz, 1 H, Ar-H), 7.45–7.46 (combined signals, 2 H, Ar-H), 7.24 (d,  $J$  = 7.6 Hz, 1 H, Ar-H), 7.07 (d,  $J$  = 8.2 Hz, 1 H, Ar-H), 7.04 (d,  $J$  = 8.5 Hz, 1 H, Ar-H), 6.88 (dd,  $J_1$  = 8.5 Hz,  $J_2$  = 2.2 Hz, 1 H, Ar-H), 6.84–6.85 (combined signals, 2 H, Ar-H), 6.79 (d,  $J$  = 8.5 Hz, 1 H, Ar-H), 6.73 (d,  $J$  = 2.2 Hz, 1 H, Ar-H), 3.83 (s, 6 H, -OCH<sub>3</sub>), 3.82 (s, 3 H, -OCH<sub>3</sub>), 3.71 (s, 3 H, -OCH<sub>3</sub>), 2.67 (combined signals, 4 H, CH<sub>2</sub>CH<sub>2</sub>).

**<sup>13</sup>C NMR** (CDCl<sub>3</sub>):  $\delta$  (ppm) = 191.9, 190.9 (2-CHO), 162.1, 159.3, 157.6, 155.2, 141.5, 137.4, 136.90, 133.6, 132.9, 132.1, 131.5, 131.1, 130.8, 129.6, 128.7, 126.2, 124.0, 114.6, 111.3, 111.0, 110.8, 109.0, 55.9, 55.8, 55.7, 55.2, 36.3, 36.0 (2CH<sub>2</sub>).

### Tetramethylether of Isoplagiochin C (3)

To  $\text{TiCl}_3(\text{DME})_2$  (513 mg, 1.52 mmol) in anhydrous dimethoxyethane (50 mL) under argon atmosphere was added zinc dust (367 mg, 5.61 mmol) and the mixture was heated to reflux for 2 h. The bibenzyl dialdehyde **31** (94.0 mg, 185  $\mu\text{mol}$ ) in anhydrous dimethoxyethane (50 mL) was added dropwise within 3 h and the mixture was heated again to reflux for 16 h. The mixture was cooled, 6 M HCl (100 mL) was added and extracted with  $\text{Et}_2\text{O}$  ( $3 \times 100$  mL). The combined organic layers were washed with  $\text{H}_2\text{O}$  to pH 7 ( $\sim 100$  mL), dried ( $\text{MgSO}_4$ ) and concentrated. The crude product was purified by CC (silica gel,  $\text{CH}_2\text{Cl}_2$ ) yielding a colorless oil which solidifies; 50 mg (56%); HPLC: Nucleosil 100-5,  $4.0 \times 250$  mm,  $\text{EtOAc}/n\text{-hexane}$  20:80.

**IR:**  $\nu$  ( $\text{cm}^{-1}$ ) = 2905, 1560, 1535, 1460, 1425, 1390, 1335, 1270, 1210, 1160, 1110, 1060, 1035, 1030, 1000, 960, 865, 815.

**$^1\text{H}$  NMR** ( $\text{CDCl}_3$ , 25  $^\circ\text{C}$ ):  $\delta$  (ppm) = 7.21 (not resolved, 1 H, Ar-H), 7.14 (not resolved, 1 H, Ar-H), 7.08 (not resolved, 1 H, Ar-H), 7.05 (not resolved, 1 H, Ar-H), 6.98 (not resolved, 1 H, Ar-H), 6.90–6.86 (combined signals, 3 H, Ar-H), 6.84, (d,  $J = 9.8$  Hz, 1 H, Ar-H), 6.81 (dd,  $J_1 = 8.2$  Hz,  $J_2 = 2.8$  Hz, 1 H, Ar-H), 6.75 (d,  $J = 8.2$  Hz, 1 H, Ar-H), 6.68 (2 d,  $J = 12.0$  Hz, 1 H, *cis*- $\text{CH}=\text{CH}$ ), 6.61 (2 d,  $J = 12.0$  Hz, 1 H, *cis*- $\text{CH}=\text{CH}$ ), 6.50 (not resolved, 1 H, Ar-H), 3.85 (s, 3 H,  $-\text{OCH}_3$ ), 3.81 + 3.80 (2 s, 3 H,  $-\text{OCH}_3$ , signals of two conformers), 3.68 + 3.50 (2 s, 3 H,  $-\text{OCH}_3$ , signals of two conformers), 2.90–2.31 (m, 4 H,  $-\text{CH}_2\text{CH}_2-$ ).

**$^{13}\text{C}$  NMR** ( $\text{CDCl}_3$ , 25  $^\circ\text{C}$ ):  $\delta$  (ppm) = 158.99, 157.62, 157.02, 156.24, 156.22, 155.28, 155.25, 143.66, 143.18, 140.07, 139.36, 135.78, 135.72, 135.54, 133.91, 133.86, 133.76, 133.74, 132.08, 131.41, 131.21, 131.02, 130.51, 130.28, 130.25, 130.08, 129.70, 129.65, 129.55, 129.17, 129.01, 128.97, 128.90, 128.88, 128.70, 128.67, 127.69, 127.55, 127.26, 126.99, 125.52, 120.79, 114.14, 113.90, 111.46, 111.00,

110.97, 110.78, 110.62, 110.59, 110.52, 110.39, 55.88, 55.76, 55.64, 55.59, 55.52,  
55.39, 55.15, 53.41, 38.34, 37.89, 37.56, 36.84.
